# Supplementary material for: The replication initiator protein of a geminivirus interacts with host monoubiquitination machinery and stimulates transcription of the viral genome
Source: PubMed Central journal article supplement (PMC5597257; doi:10.1371/journal.ppat.1006587), 2017-08-31
Supplement: ppat.1006587.s010.pdf [file ppat.1006587.s010.pdf]

Supplemental Table 1: Annotation and homology analysis of NbUBC2 and NbHUB1.

| <b>Plant species</b>             | <b>Accession no</b> | <b>E-value</b> | <b>identity (%)</b> |
|----------------------------------|---------------------|----------------|---------------------|
| <b>NbUBC2</b>                    |                     |                |                     |
| <i>Nicotiana tomentosiformis</i> | XP_009589859.1      | 3e-108         | 99                  |
| <i>Solanum lycopersicum</i>      | XP_004232235.1      | 5e-108         | 99                  |
| <i>N. sylvestris</i>             | XP_009779442.1      | 7e-108         | 99                  |
| <i>Solanum tuberosum</i>         | XP_006344417.1      | 8e-108         | 99                  |
| <i>N. tabacum</i>                | BAB40311.1          | 1e-107         | 99                  |
| <i>Zea mays</i>                  | ACG37110.1          | 7e-108         | 99                  |
| <i>Oryza sativa</i>              | NP_001058973.1      | 1e-106         | 97                  |
| <i>Sesamum indicum</i>           | XP_011085767        | 2e-107         | 98                  |
| <i>Medicago truncatula</i>       | XP_013445765.1      | 3e-106         | 97                  |
| <b>NbHUB1</b>                    |                     |                |                     |
| <i>S. lycopersicum</i>           | XP_010312797.1      | 0.0            | 100                 |
| <i>S. tuberosum</i>              | XP_006366930.1      | 0.0            | 97                  |
| <i>N. sylvestris</i>             | XP_009798154.1      | 0.0            | 88                  |
| <i>Vitis vinifera</i>            | XP_010661359.1      | 0.0            | 64                  |
| <i>Populus trichocarpa</i>       | XP_006375233.1      | 0.0            | 61                  |
| <i>Theobroma cacao</i>           | XP_007052228.1      | 0.0            | 63                  |
| <i>Glycine max</i>               | XP_006591212.1      | 0.0            | 59                  |
