# Supplementary material for: The replication initiator protein of a geminivirus interacts with host monoubiquitination machinery and stimulates transcription of the viral genome
Source: PubMed Central journal article supplement (PMC5597257; doi:10.1371/journal.ppat.1006587), 2017-08-31
Supplement: ppat.1006587.s011.pdf [file ppat.1006587.s011.pdf]

Supplemental Table 2: Primers sequences used in the study.

| Primer pair No | Primer name            | Primer sequences (5'-3')                                                                        |
|----------------|------------------------|-------------------------------------------------------------------------------------------------|
| 1              | DsRed                  | FP GGATCCATGGCCTCCTCCGAGAA<br>RP TCTAGACTATAGGAACAGGTCGT                                        |
| 2              | Rep Full               | FP GGATCCTAATGCCTAGGGCTGGGAGA<br>RP GAGCTCTCAACGCGTCGACGCCTGGTCC                                |
| 3              | Rep 1-120 (Y2H)        | FP GGATCCTAATGCCTAGGGCTGGGAGA<br>RP GAGCTCGCCATCGATTTGGAAACTCC                                  |
| 4              | Rep 1-180 (Y2H)        | FP GGATCCTAATGCCTAGGGCTGGGAGA<br>RP GAGCTCATAAACCTCCAACGGAGGTG                                  |
| 5              | Rep 181-361 (Y2H)      | FP GGATCCATATGTTTCTCCTTTTTCTTCTTCTTC<br>RP GAGCTCACGCGTCGACGCCTGGTCCCC                          |
| 6              | NbHUB1(BiFC)           | FP CTCGAGATGGA AAACTTGCTACCGCTTGACAC<br>RP GGTACCTTTGCTCCAAAGCTTGACAGAGC                        |
| 7              | NbUBC2-VIGS-           | FP CTCGAGATGATGTCGACTCCAGCGAGGAAGAG<br>RP GGTACCGGATCCCTAGTCGGCAGTCCAGCTTTGTTC                  |
| 8              | NbUBC2(Y2H)            | FP CATATGATGTCGACTCCAGCGAGGAAGAGATTGATGAGG<br>RP GGATCCCTAGTCGGCAGTCCAGCTTTGTTTCGACAACCTCGCGGAC |
| 9              | Rep-His                | FP GGATCCATGCCTAGGGCTGGGAGATTCAA<br>RP AAGCTTGACGCGTCGACGCCTGGTCC                               |
| 10             | Rep (BiFC)             | FP GGTACCGCCATCGATTTGGAAACTCC<br>RP GGTACCATAAACCTCCAACGGAGGTG                                  |
| 11             | NbHUB1 (VIGS)          | FP GAATTC CCCATGGTAATGGA AAACTTGCTACCGCTTGACAC<br>RP GAATTCCTCGGCTTTATTCTTAGCATCGG              |
| 12             | NbHUB1 Full            | FP GTCGACTATGGA AAACTTGCTACCGC<br>RP GTCGACTCAGATATAAACGGCCTTGACATCATTGTC                       |
| 13             | NbHUB1 1-213           | FP GAATTCATGGTAATGGA AAACTTGCTACCGCTTGACAC<br>RP GAATTCCTCGGCTTTATTCTTAGCATCGG                  |
| 14             | NbHUB1 1-593           | FP GAATTCATGGTAATGGA AAACTTGCTACCGCTTGACAC<br>RP GTCGACAGACTTCAAGACTTCCGAGAGTCTAG               |
| 15             | NbHUB1 (qRT)           | FP ATGGAAA ACTTGCTACCGCTTG<br>RP AGACAGA ACCATCTTCTGCGC                                         |
| 16             | NbUBC2 (qRT)           | FP GAAATTCCTGCCGCTTTAACACCCAG<br>RP GCAAATACTCCCATCGGCAT                                        |
| 17             | NbH2B(qRT)             | FP CAGGTT CATCTGATATTGGTATCTCT<br>RP AGTCTGAATCTCCCGAGAAGTGA                                    |
| 18             | Nbactin (qRT)          | FP AGGCTGGATTTGCTGGAGATGATG<br>RP CGTTG TAAAAAGTATGATGCCAAAT                                    |
| 19             | REP (Localization)     | FP GGTACCATGCCTAGGGCTGGGAGATTCAAT<br>RP GGATCCACGCGTCGACGCCTGGTCC                               |
| 20             | EGFP                   | FP GGATCCATGGTGAGCAAGGGCGAGGAGC<br>RP TCTAGATTACTTGTACAGCTCGTCCATGCC                            |
| 21             | NbUBC2                 | FP GAATTCATGTCGACGCCGGCGAGGAAAAGATTG<br>RP GGTACCGTCAGCCGTCCAGCTCTGCTCAAC                       |
| 22             | NbHUB1(pCXDG)          | FP AATGGAAA ACTTGCTACCGCTTGACAC<br>RP TTTGCTCCAAAGCTTGACAGAGC                                   |
| 23             | EMSA CR                | FP AATTAGTGCATCTCAAAA<br>RP ACGTGCGTGGTGGGGCCCC                                                 |
| 24             | C2(Y2H)                | FP CCATGGATGCGACCTTCATCACCCCT<br>RP GGATCCCTAAATACCCTTAAGAAA                                    |
| 25             | ChiLCV promoter (ChIP) | FP AATTAGTGCATCTCAAAA<br>RP ACGTGCGTGGTGGGGCCCC                                                 |
| 26             | C3 (ChIP)              | FP GTATGCTACCTTAAAGA<br>RP GTATTATGGAATGTATTAGC                                                 |
| 27             | NbH2B BiFC             | FP GGATCCATATGGCACCAAGGCAGCAGCAGG<br>RP GGTACCGTCGGCGCTGCCAGCGTCCCTTTGG                         |
| 28             | NbUBC2 BiFC            | FP GGATCCATGATGTCGACTCCAGCGAGGAAGAG<br>RP GGTACCGTCAGCCGTCCAGCTCTGCTCAAC                        |
| 29             | Rep1-120DsRed          | FP GAGCTC ATGCCTAGGGCTGGGA<br>RP GGTACC GCCATCGATTTGAAAA                                        |
| 30             | Rep1-180DsRed          | FP GAGCTC ATGCCTAGGGCTGGGA<br>RP GGATCC ATAACTCCAACGGAG                                         |
| 31             | C2-qRT                 | FP CTAATAACCTTAAGAAAATGACCAGTCTG<br>RP ATGCGACCTTCATCATCACCCCT                                  |
