# Supplementary material for: The replication initiator protein of a geminivirus interacts with host monoubiquitination machinery and stimulates transcription of the viral genome
Source: PubMed Central journal article supplement (PMC5597257; doi:10.1371/journal.ppat.1006587), 2017-08-31
Supplement: ppat.1006587.s014.pdf [file ppat.1006587.s014.pdf]

### S3 Text : Putative nuclear localization signals (NLS) of NbUBC2, NbHUB1 and Rep proteins.

#### Predicted putative NLS in NbHUB1 protein

```

MENLLPLDTAVLLHQNQKLSQKLEAQKIEI AVLLEEKFTELRDKQKPYDNT 50
LSAIQKSWEELVGELEICSTRTEDPIRHGNASNDQSCAEDGSVYACDDSF 100
LSLLLQGTGATGSSSDVNTQTEYEQKKMDDQKIVKIFRNIVSTVDNVRQMK 150
DKLCAAVLEVLPELGDGSLQKSLSDLHVGKNIQTINELHLKHRSLAGAL 200
QNHRDRTDAKNKAELKCLRGELEKTI AHLDES NRKLA I LKAEK DAAKGVLF 250
PVLNLGNKHSANDKARDKQRDMQDMESTLKEYLDQSSF RLFELKRLHEER 300
IDILKQLSNLQNKLNKAI CSSQPYILVKDQLAKAKEDLSLYQSLYEKL 350
QVEKDNLSWREKEMNLKNDITDVFRRSSTIADSR IAWLEKEMQKHMQERN 400
MIEGKLEEASREPGRKEIIAEFKKLVSSFPETMGDMQNQLSNYKETASDV 450
HSLRTDVQSLSSILDRKSKEIEALS AKSASQVTEMLKLQAVVNDLKESDM 500
HLKLI LEMYTRESAFSRDVF EARSSEYRAWARVQSLKTSLDEHNLEVRVK 550
SAIEAEADSQQKLGAAEAEIAELRQKLDASKRERSRLSEVLKSKHEE TEA 600
YLSEIETIGQAYDDMQAQNQQLFQQITERDDYNIKLVLEGVRRARQQRDCL 650
AWESQITERAVEDANTMVSSYEMKAAKID DQLRGCSDLIQKLAEDRGQNS 700
LALENTQKRFLDVRKSSQQLRETLEEWQSKIDEV RVDLAQLQIELEKERF 750
ERKRAEEDVEALRRKTSRLRSHIEGSSVIEK LQQKLREYKEILNCSICFD 800
RRKEVVLAKCYHLFCNPCIQKIVETRHRKCPVCSASFGANDVKAVYI 847
    
```

| Predicted bipartite NLS |                                 |       |
|-------------------------|---------------------------------|-------|
| Pos.                    | Sequence                        | Score |
| 289                     | RLFELKRLHEERIDILKQLSNLQNKLNKAI  | 7.4   |
| 704                     | ENTQKRFLDVRKSSQQLRETLEEWQSKIDEV | 5.1   |

#### NbUBC2 lacks putative NLS sequence

```

MSTPARKRLMRDFKRLQQDPPAGISGAPYDNNIMLWNAVIFGPDDTPWDG 50
GTFKLTLOFSEDYPNKPTVRFISRMFHPNIYADGSICLDILQNWSP IY 100
DVAAILTSIQSLLCDPNPNSPANSEAARMFSENKREYNRKVREIVEQSWT 150
AD 152
    
```

#### Predicted putative NLS sequence in ChiLCV Rep protein

```

MPRAGR FNINAKNYFLTYPNCSLTKEEALSQ LQNLETPVNKLFIRVCREL 50
HENREPHLHVLVQFEGKYQCTNNRFFDLISPTRSAHFHPNIQRAKSSSDV 100
KAYVEKDGDFIDFGVFQIDGRSARGGCQSANDAYAEA INSGSKSSALNIL 150
REKAPKDYVLQFHNLNANLDRI FT PPLEVYVSPFSSSSFDQVP EELEEWA 200
AENVLGAAARPLRPM SIVIEGESRTGKT IWARSLGPHNYLCGHL DLSPKV 250
YSNDAWYNVIDDVPHYLKHFK E FMGAQRDQWQSN TKYGKPVQIKGGIPAI 300
FLCNP GPNSSYKEFLDEEKNSALRNWALKNATFITLEGPLYSGSNQSAAQ 350
ASQEGDQASTR 361
    
```

| Predicted bipartite NLS |                               |       |
|-------------------------|-------------------------------|-------|
| Pos.                    | Sequence                      | Score |
| 245                     | DLSPKVYSNDAWYNVIDDVPHYLKHFK E | 5     |
