# Supplementary material for: The replication initiator protein of a geminivirus interacts with host monoubiquitination machinery and stimulates transcription of the viral genome
Source: PubMed Central journal article supplement (PMC5597257; doi:10.1371/journal.ppat.1006587), 2017-08-31
Supplement: ppat.1006587.s015.pdf [file ppat.1006587.s015.pdf]

S4 Text : Multiple alignment of nucleotide sequences of *NbUBC1* and *NbUBC2* of *N. benthamiana* by ClustalW ([www.ebi.ac.uk/Tools/msa/clustalw2](http://www.ebi.ac.uk/Tools/msa/clustalw2)).

```
NbUBC2      ATGTGCGACTCCAGCGAGGAAAGATTGATGAGGGATTTAAGCGGTTACAGCAAGATCCC
NbUBC1      ATGTGCGACTCCAGCTAGAAAAGGTTGATGAGAGATTTCAAGAGGTTGCAGCAGGACCTT
*****
NbUBC2      CCGGCCGGCATCAGTGGAGCTCGTATGACAACAATATAATGCTATGGAATGCAGTCATT
NbUBC1      CCTGCTGGTATAGTGGTGCACCTCAAGACAACAACATATGCTTTGGAATGCCGTGATA
** * * * * *
NbUBC2      TTGCGCCCTGATGATACTCCCTGGGATGGAGGTACATTTAAGCTGACACTTCAATTC TCA
NbUBC1      TTTGGTCTCTGATGACACTCCCTGGGATGGTGGTACGTTCAAGCTGACTCTTCAATTC TCT
** * * * * *
NbUBC2      GAGGACTATCCAAACAAACCACCAACTGTGCGGTTTATTTCCAGAATGTCCACCCAAT
NbUBC1      GAGGATTACCCCAATAAGCCACCAACAGTGC GGTTTGTCTCGCATGTTTCATCTAAC
*****
NbUBC2      ATTTACGCTGATGGAAGTATTTGCTTAGACATCTGCAAAATCAGTGGAGTCCCATATAT
NbUBC1      ATTTATGCAAGATGGAAGTATATGTTGGATATTCTCAAAATCAGTGGAGTCCAAATATAT
*****
NbUBC2      GATGTAGCTGC TATACTGACTTCAATCCAGTCTTTGCTCTGTGATCCAAATCCTAAC TCG
NbUBC1      GATGTTGCAGCTATACTTACATCCATTCAGTCA TTGCTGTGCGATCCCAACCCAAT TCA
*****
NbUBC2      CCAGCAAAATTCAGAAGCAGCACGCATGTTCAGTGAGAA CAAGCGTGAATACAACGGAAG
NbUBC1      CCTGCAAAATTCGGAAGCAGCTCGGATGTTCAGCGAGAA TAAAAGGGA TACAACCGCAGA
** * * * * *
NbUBC2      GTGCGCGAGGTTGTTCGAACAAAGCTGGACTGCCGACTAG-----
NbUBC1      GTTAGAGAAAGTTGTGGAGCAGAGCTGGACTGCTGACGGATCCATCTGCTGA
** * * * * *
```
